# Supplementary material for: Formulation and Characterization of Emulgel-Based Jelly Candy: A Preliminary Study on Nutraceutical Delivery
Source: MDPI journal article supplement (doi:10.3390/gels9060466), 2023-06-06
Supplement: s1 [file s1]

# Formulation and Characterization of Emulgel-Based Jelly Candy: A Preliminary Study on Nutraceutical Delivery

Somali Dhal <sup>1,†</sup>, Anupam Pal <sup>2,†</sup>, Anna Gramza-Michalowska <sup>3</sup>, Doman Kim <sup>4</sup>, Biswaranjan Mohanty <sup>2,\*</sup>, Sai S. Sagiri <sup>5</sup> and Kunal Pal <sup>1,\*</sup>

## Supplementary data

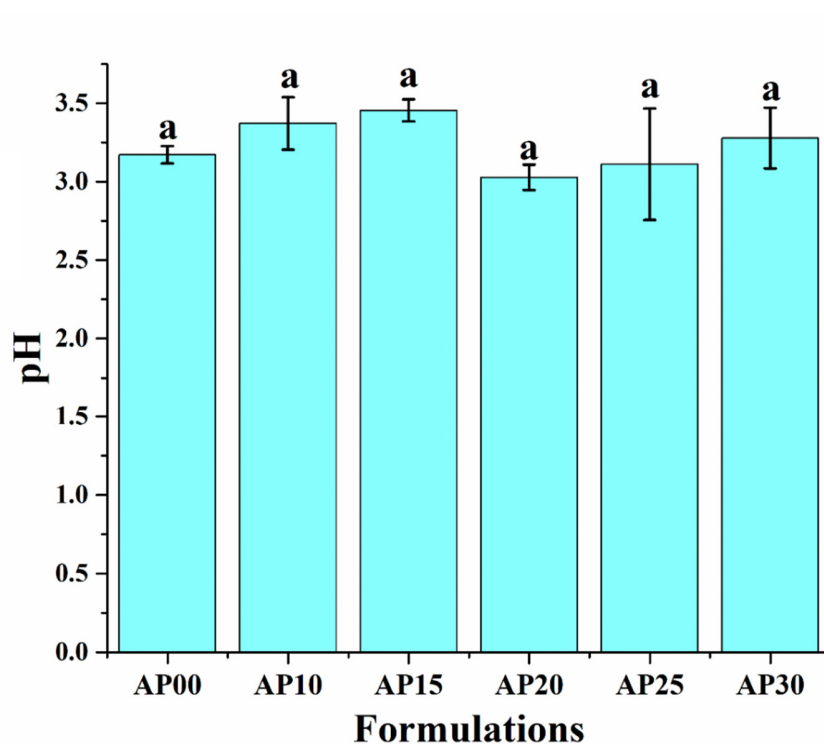

**Figure S1:** pH of emulsion-filled candy formulations. Columns having the same alphabet suggests that they are statistically similar by Tukey HSD test with  $p > 0.05$ .

**Table S1.** Absorption signal at different wavenumbers.

| <b>Wavenumber<br/>(cm<sup>-1</sup>)</b> | <b>Functional group</b>                                                                                | <b>References</b>          |
|-----------------------------------------|--------------------------------------------------------------------------------------------------------|----------------------------|
| 3277                                    | OH stretching                                                                                          | (Patil and Netravali 2019) |
| 2926                                    | Asymmetric C-H stretching of aliphatic groups of the sucrose molecule.                                 | (Tohamy et al. 2022)       |
| 1642                                    | Stretching of OH, COO <sup>-</sup> (asymmetric), COO <sup>-</sup> (symmetric), and C O C, respectively | (Romano et al. 2016)       |
| 1414                                    | Torsion OH, twisting H <sub>2</sub> O                                                                  | (Brizuela et al. 2014)     |
| 1345                                    | Symmetric scissoring of the C-OH                                                                       | (Brizuela et al. 2014)     |
| 1022                                    | Stretching of C-C                                                                                      | (Bichara et al. 2014)      |
